# Supplementary material for: A review of microplastic fibres: generation, transport, and vectors for metal(loid)s in terrestrial environments
Source: Royal Society of Chemistry journal article supplement (doi:10.1039/d1em00541c), 2022-01-01
Supplement: d1em00541c1.pdf [file d1em00541c1.pdf]

## **Supplementary Information**

**A review of microplastic fibres: generation, transport, and vectors for metal(loid)s in terrestrial environments**

**Table S1:** Reported and mean metal(loid)s concentrations of European, municipal sewage sludge from studies published in 2019. Missing values were not quantified in the respective studies.

| Reference                                | Metal(loid) Concentration (mg kg <sup>-1</sup> dry sludge) |             |             |              |               |             |               |              |              |              |             |             |              |               |            |             |               |
|------------------------------------------|------------------------------------------------------------|-------------|-------------|--------------|---------------|-------------|---------------|--------------|--------------|--------------|-------------|-------------|--------------|---------------|------------|-------------|---------------|
|                                          | As                                                         | Cd          | Co          | Cr           | Cu            | Hg          | Mn            | Mo           | Ni           | Pb           | Sb          | Se          | Sn           | Sr            | Tl         | V           | Zn            |
| Antonkiewicz et al. (2019) <sup>98</sup> |                                                            | 0.867       |             | 47.3         | 133           | 0.45        | 109.7         |              | 16.6         | 33.5         |             |             |              |               |            |             | 258           |
| Barca et al. (2019) <sup>99</sup>        |                                                            | 16          | 12          | 140          | 2500          |             | 440           |              | 66           | 200          |             | 66          |              |               |            | 15          | 2080          |
| Bartkowska et al. (2019) <sup>100</sup>  |                                                            | 1.91        |             | 258.26       | 331.97        | 0.75        |               |              | 33.01        | 34.67        |             |             |              |               |            |             | 716.34        |
|                                          |                                                            | 2.28        |             | 33.06        | 287.26        | 0.8         |               |              | 24.18        | 52.92        |             |             |              |               |            |             | 1458.62       |
|                                          |                                                            | 1.33        |             | 25.81        | 209.17        | 0.6         |               |              | 16.65        | 17.63        |             |             |              |               |            |             | 1395.89       |
|                                          |                                                            | 2.12        |             | 43.38        | 203.52        | 0.41        |               |              | 14.63        | 22.25        |             |             |              |               |            |             | 813.1         |
|                                          |                                                            | 1.56        |             | 67.36        | 529.43        | 7.14        |               |              | 47.25        | 44.63        |             |             |              |               |            |             | 1233.41       |
|                                          |                                                            | 1.39        |             | 17.33        | 312.67        | 2.52        |               |              | 13.37        | 12.47        |             |             |              |               |            |             | 1110.67       |
|                                          | 1.64                                                       |             | 35.68       | 298.25       | 1.54          |             |               | 15.31        | 20.94        |              |             |             |              |               |            | 1007.33     |               |
| Bastida et al. (2019) <sup>101</sup>     |                                                            | 0.67        |             | 46.21        | 174.88        |             | 164.46        | 12.00        | 32.42        | 42.94        |             |             |              | 669.39        |            |             |               |
| Černe et al. (2019) <sup>102</sup>       |                                                            | 0.7         |             | 21.1         | 103.6         | 0.9         |               |              | 9.5          | 32.8         |             |             |              |               |            |             | 650.0         |
|                                          |                                                            | 0.8         |             | 88.6         | 393.3         | 1.8         |               |              | 44.2         | 51.2         |             |             |              |               |            |             | 1112.7        |
|                                          |                                                            | 1.1         |             | 30.3         | 186.3         | 0.9         |               |              | 20.6         | 42.0         |             |             |              |               |            |             | 917.5         |
| Jaskulak et al. (2019) <sup>74</sup>     |                                                            | 7.62        |             |              |               |             |               |              |              | 242.84       |             |             |              |               |            |             | 2471.15       |
|                                          |                                                            | 4.27        |             |              |               |             |               |              |              | 64.55        |             |             |              |               |            |             | 733.36        |
| Kicińska et al. (2019) <sup>103</sup>    |                                                            | 6           |             | 75           | 220           |             |               |              | 17           | 173          |             |             |              |               |            |             | 1086          |
| Ledakowicz et al. (2019) <sup>75</sup>   |                                                            | 1.37        |             | 330          | 440           | 1.26        | 556           |              | 153          | 32.1         |             |             |              |               |            |             | 757           |
| Regkouzas et al. (2019) <sup>104</sup>   |                                                            |             |             | 145.2        | 363.7         |             |               |              | 99.3         | 80.7         |             |             |              |               |            |             | 836.4         |
|                                          |                                                            |             |             | 140.3        | 380.4         |             |               |              | 93.5         | 186.6        |             |             |              |               |            |             | 1842.5        |
|                                          |                                                            |             |             | 81.5         | 219.5         |             |               |              | 86.3         | 60           |             |             |              |               |            |             | 664           |
| Ronda et al. (2019) <sup>32</sup>        | 4.6                                                        | 1.9         | 5.1         | 73           | 384           |             | 206           |              | 106          | 48           | 13.7        | 1           | 284.8        |               | 0.3        | 59.8        | 304.4         |
| Turek et al. (2019) <sup>105</sup>       |                                                            | 3.85        |             | 10.2         | 132.55        |             |               |              | 15.8         | 31.85        |             |             |              |               |            |             | 875.55        |
|                                          |                                                            | 5.25        |             | 7            | 106.45        |             |               |              | 19.9         | 42.1         |             |             |              |               |            |             | 681.35        |
|                                          |                                                            | 3.6         |             | 11.85        | 124.5         |             |               |              | 20.3         | 32.15        |             |             |              |               |            |             | 886.6         |
|                                          |                                                            | 5.2         |             | 9.45         | 100.8         |             |               |              | 21.6         | 50.5         |             |             |              |               |            |             | 704.05        |
|                                          |                                                            | 2.55        |             | 10.7         | 111.9         |             |               |              | 13.15        | 30.75        |             |             |              |               |            |             | 792.2         |
|                                          |                                                            | 10.7        |             | 8.4          | 86.8          |             |               |              | 16.9         | 39.75        |             |             |              |               |            |             | 601.2         |
| Urra et al. (2019) <sup>106</sup>        |                                                            | 3           |             | 73           | 196           |             |               |              | 40           | 47           |             |             |              |               |            |             | 936           |
| <b>Mean</b>                              | <b>4.6</b>                                                 | <b>3.41</b> | <b>8.55</b> | <b>71.35</b> | <b>348.72</b> | <b>1.72</b> | <b>327.93</b> | <b>12.00</b> | <b>43.17</b> | <b>58.80</b> | <b>13.7</b> | <b>33.5</b> | <b>284.8</b> | <b>669.37</b> | <b>0.3</b> | <b>37.4</b> | <b>956.39</b> |

**Table S2:** UK, EU and USA legislative limits on soil and sludge concentrations of metal(loid)s permissible for use in agriculture, and loading limits to agricultural soils. \* = values correspond to residential/allotment/commercial limits respectively. # = if total CaCO<sub>3</sub> concentration of soil is ≥ 5%. Sources: GB Parliament (1989),<sup>109</sup> DoE (1996),<sup>110</sup> EU (1986).<sup>111</sup>

| Regulatory Body/ Legislation |    | Environment Agency (UK)       | Environmental Protection Agency (USA) | EU Sewage Sludge Directive 86/278/EEC Limit Values |                                     |                | UK Sludge (Use in Agriculture) Regulations 1989, no 1263 |            |            |            |          |                                           |
|------------------------------|----|-------------------------------|---------------------------------------|----------------------------------------------------|-------------------------------------|----------------|----------------------------------------------------------|------------|------------|------------|----------|-------------------------------------------|
| Name of Regulation           |    | Soil Guideline Values (SGVs)* | Soil Screening Guidance Values        | Agricultural Soils                                 | Sludge applied to agricultural land | Annual Loading | Soil limit values                                        |            |            |            |          | Maximum Permissible Average over 10 Years |
| Units                        |    | mg/kg soil                    | mg/kg soil                            | mg/kg soil                                         | mg/kg dry matter                    | g/ha/year      | pH > 5                                                   | pH 5.0-5.5 | pH 5.5-6.0 | pH 6.0-7.0 | pH > 7.0 |                                           |
| Element                      | As | 32/43/640                     | 0.4                                   | -                                                  | -                                   | -              | 50                                                       | -          | -          | -          | -        | 0.7                                       |
|                              | Cd | 10/2/230                      | 78                                    | 3                                                  | 40                                  | 0.15           | 3                                                        | -          | -          | -          | -        | 0.15                                      |
|                              | Cr | -                             | 390                                   | -                                                  | -                                   | -              | 400                                                      | -          | -          | -          | -        | 15                                        |
|                              | Cu | -                             | -                                     | 140                                                | 1750                                | 12             | -                                                        | 80         | 100        | 135        | 200      | 7.5                                       |
|                              | Hg | 1/26/26                       | 23                                    | 5                                                  | 25                                  | 0.1            | 1                                                        | -          | -          | -          | -        | 0.1                                       |
|                              | Ni | 130/230/1800                  | 1600                                  | 75                                                 | 400                                 | 3              | -                                                        | 50         | 60         | 75         | 110      | 3                                         |
|                              | Pb | -                             | 400                                   | 300                                                | 1200                                | 15             | 300                                                      | -          | -          | -          | -        | 15                                        |
|                              | Se | 350/120/13000                 | 390                                   | -                                                  | -                                   | -              | 3                                                        | -          | -          | -          | -        | 0.15                                      |
| Zn                           | -  | 23000                         | 300                                   | 4000                                               | 30                                  | -              | 200                                                      | 250        | 300        | 450        | 15       |                                           |
